# Supplementary material for: Magnetotactic Bacteria Accumulate a Large Pool of Iron Distinct from Their Magnetite Crystals
Source: PubMed Central journal article supplement (PMC7642088; doi:10.1128/aem.01278-20), 2020-10-28
Supplement: AEM.01278-20-s0001.pdf [file AEM.01278-20-s0001.pdf]

1 Supplementary information for

2

3 **Magnetotactic bacteria accumulate a large pool of iron distinct**  
4 **from their magnetite crystals**

5

6 Matthieu Amor<sup>1\*</sup>, Alejandro Ceballos<sup>2</sup>, Juan Wan<sup>1</sup>, Christian P. Simon<sup>3</sup>, Allegra T. Aron<sup>4,5,6</sup>,  
7 Christopher J. Chang<sup>4,7</sup>, Frances Hellman<sup>2,3,8</sup>, Arash Komeili<sup>1,7</sup>

8

9 Corresponding authors: [matthieu.amor@cea.fr](mailto:matthieu.amor@cea.fr) (MA); [komeili@berkeley.edu](mailto:komeili@berkeley.edu) (AK)

10

## 11 **Supplementary text**

### 12 **Incubation of a mutant AMB-1 strain unable to form magnetosomes with FIP-1**

13 An AMB-1 mutant unable to form magnetosomes from which the entire MAI has been  
14 deleted ( $\Delta$ MAI strain) was used as a negative control for FIP-1 experiments.  $\Delta$ MAI cells were  
15 cultivated as described above in the absence of an iron source. To ensure that no iron  
16 contamination from the glassware occurs, tubes containing  $\Delta$ MAI cells were soaked with an  
17 oxalic acid solution (concentration of 4.25 g per liter) overnight. After incubation with FIP-1,  
18 bacteria were centrifuged and suspended in fresh PBS to remove FIP-1 probes in the external  
19 solution. Wild-type and  $\Delta$ MAI AMB-1 were incubated with FIP-1 for 90 min, and observed  
20 by Structured Illumination Microscopy with a Carl Zeiss Elyra PS.1 Super Resolution  
21 fluorescence microscope, as described in the main text. Results are shown in Figs. S4 and S5.

22

### 23 **Magnetite size and shape factor**

24 The length of magnetite crystals produced by wild-type AMB-1 was measured from electron  
25 microscopy images using the ImageJ software. Results are given in Fig. S2, and show longer  
26 crystals when AMB-1 is cultivated under higher iron conditions. The nanoparticle shape  
27 anisotropy was then quantified by measuring the shape factor ( $s$ ) defined as:

28

$$29 \quad s = \frac{\textit{width}}{\textit{length}} \quad (\text{Eq. S1})$$

30

31 Assuming a consistent shape factor, a linear relationship exists between the width and the  
32 length. Results are given in Fig. S3, and show a rough linear relationship between magnetite  
33 width and length, with correlation coefficients of 0.86 and 0.89 for iron concentration

34 conditions of 30 and 150  $\mu\text{M}$ , respectively. Shape factors showed similar values (0.80 and  
35 0.82) almost similar to what has been measured in AMB-1 before (1).

36

### 37 **Saturation magnetization in mutant strains**

38 The saturation magnetization measured in  $\Delta\text{mamT}$  samples showed a 100-fold decrease  
39 compared to the wild-type strain (Table 5). From measurement of (i) the crystal size, (ii) the  
40 number of crystals per cell, and (iii) the shape factor (width/length ratio) in  $\Delta\text{mamT}$  and wild-  
41 type strains (Table S2), only a  $\sim 30$ -fold decrease of magnetite volume and associated  
42 saturation magnetization can be expected. The detection limit of the VSM we used for the  
43 magnetic characterizations is 300 times lower than the magnetization in  $\Delta\text{mamT}$  samples.  
44 Even though 2D projections of 3D objects can generate biases, the lower saturation  
45 magnetization than expected in  $\Delta\text{mamT}$  AMB-1 could be explained by crystal phases distinct  
46 from magnetite and showing lower saturation magnetization. One example of such phases  
47 include hematite, which has a saturation magnetization of 0.3 emu/g (2). From single-crystal  
48 characterization, Jones and co-workers identified only magnetite crystals in  $\Delta\text{mamT}$  AMB-1  
49 (3). Therefore, it is possible that some other crystal phases were missed. Dedicated  
50 experimental work and bulk characterizations of iron phases in  $\Delta\text{mamT}$  AMB-1 will be  
51 needed to address this question.

52 Crystal phases in  $\Delta\text{mamP}$  AMB-1 were characterized by Jones and co-workers following the  
53 same single-crystal approach (3). Therefore, additional crystal phases than magnetite might as  
54 well be contained in this mutant strain. However, the decrease in saturation magnetization of  
55  $\Delta\text{mamP}$  compared to the wild-type strain expected from electron microscopy ( $\sim 10$ -fold, see  
56 Table S2) showed a much lower discrepancy than the one we measured ( $\sim 20$ -fold, see Table  
57 5). In this case, the discrepancy between expected and measured saturation magnetization  
58 could also be explained from biases generated by 2D projection of 3D objects. Moreover,

59 magnetite porosity in MTB has never been characterized. The density of magnetite could also  
60 show variations between the several AMB-1 strains we tested.

61 **Supplementary references**

- 62 1. Li J, Pan Y, Chen G, Liu Q, Tian L, Lin W. 2009. Magnetite magnetosome and  
63 fragmental chain formation of *Magnetospirillum magneticum* AMB-1: transmission  
64 electron microscopy and magnetic observations. *Geophys J Int* 177:33–42.  
65 <https://doi.org/10.1111/j.1365-246X.2009.04043.x>.
- 66 2. Cornell RM, Schwertmann U. 2003. *The Iron Oxides: Structure, Properties, Reactions,*  
67 *Occurrences and Uses.* John Wiley & Sons.
- 68 3. Jones SR, Wilson TD, Brown ME, Rahn-Lee L, Yu Y, Fredriksen LL, Ozyamak E,  
69 Komeili A, Chang MCY. 2015. Genetic and biochemical investigations of the role of  
70 MamP in redox control of iron biomineralization in *Magnetospirillum magneticum*. *Proc*  
71 *Natl Acad Sci U S A* 112:3904–3909. <https://doi.org/10.1073/pnas.1417614112>.

72

73 **Supplementary figures**

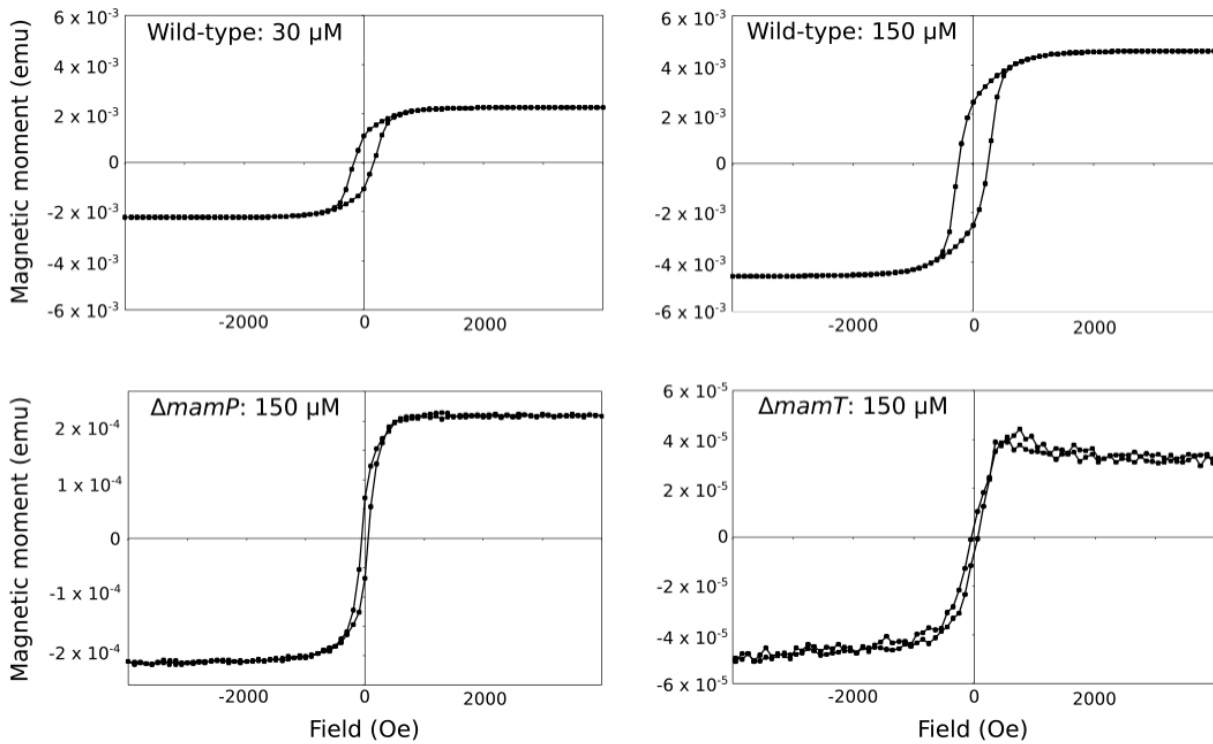

74

75 **FIG S1** Hysteresis loops acquired from whole bacterial cultures, corresponding to wild-type  
76 AMB-1 cultivated under low- and high-iron conditions, and the  $\Delta mamP$  and  $\Delta mamT$  strains.

77 Note the different y-axes.

78

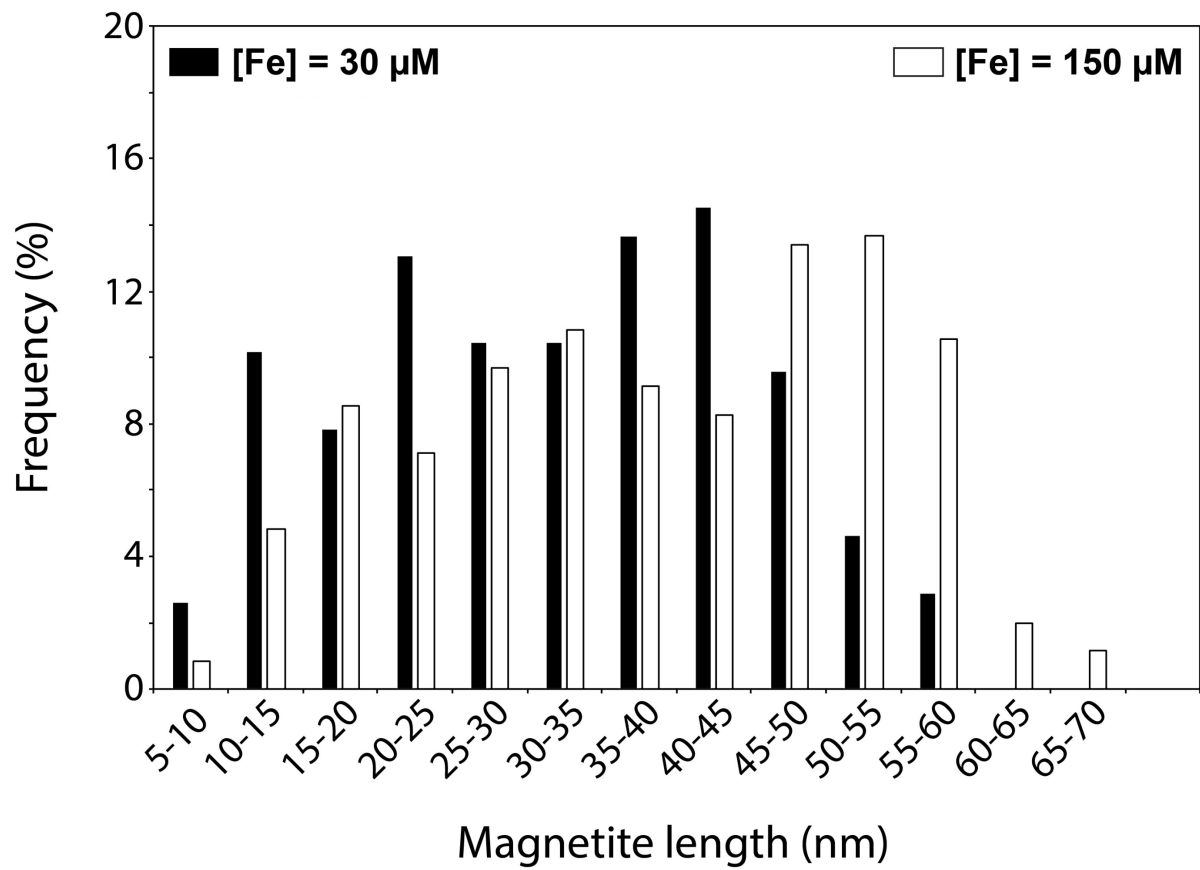

79

80 **FIG S2** Distribution of magnetite length produced in wild-type AMB-1 cultivated for three  
 81 days with iron at 30 (black bars) or 150  $\mu$ M (white bars).

82

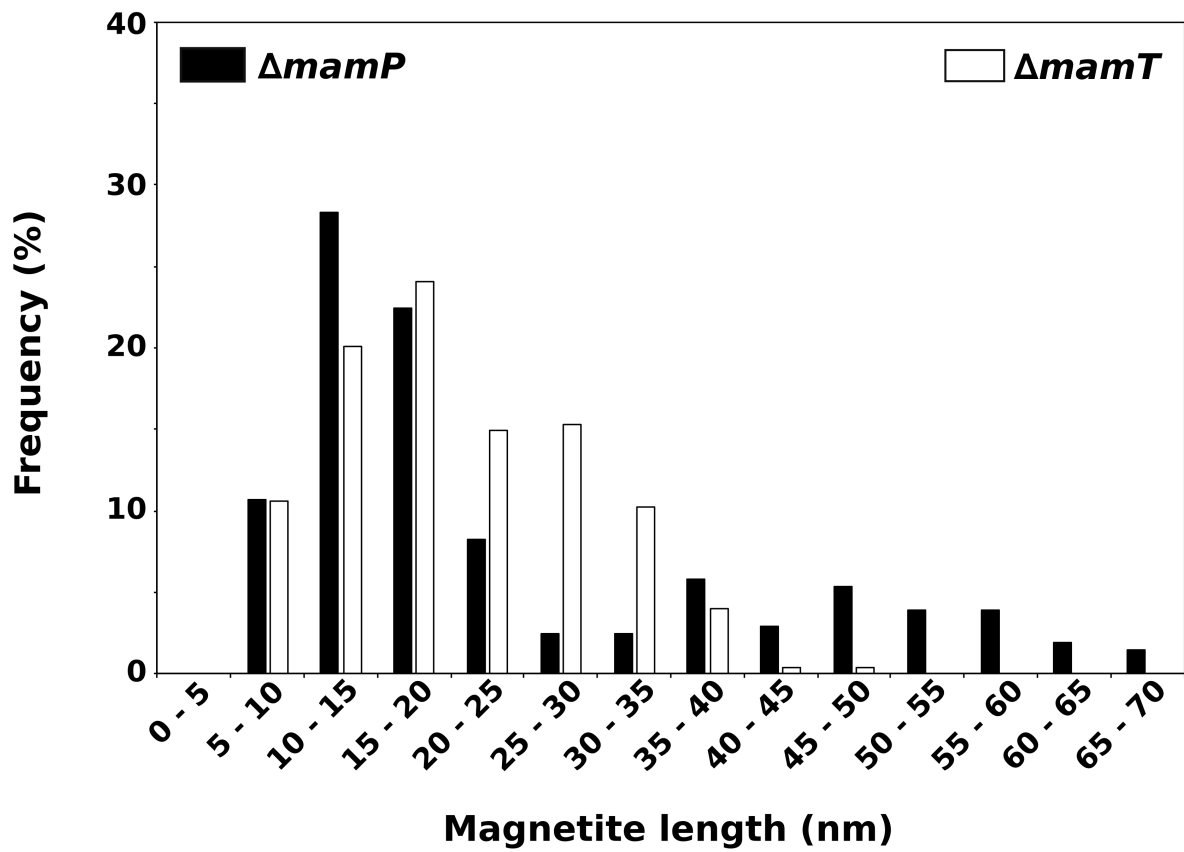

83

84 **FIG S3** Distribution of magnetite length produced in  $\Delta mamP$  (black bars) and 150  $\Delta mamT$   
 85 (white bars) AMB-1.

86



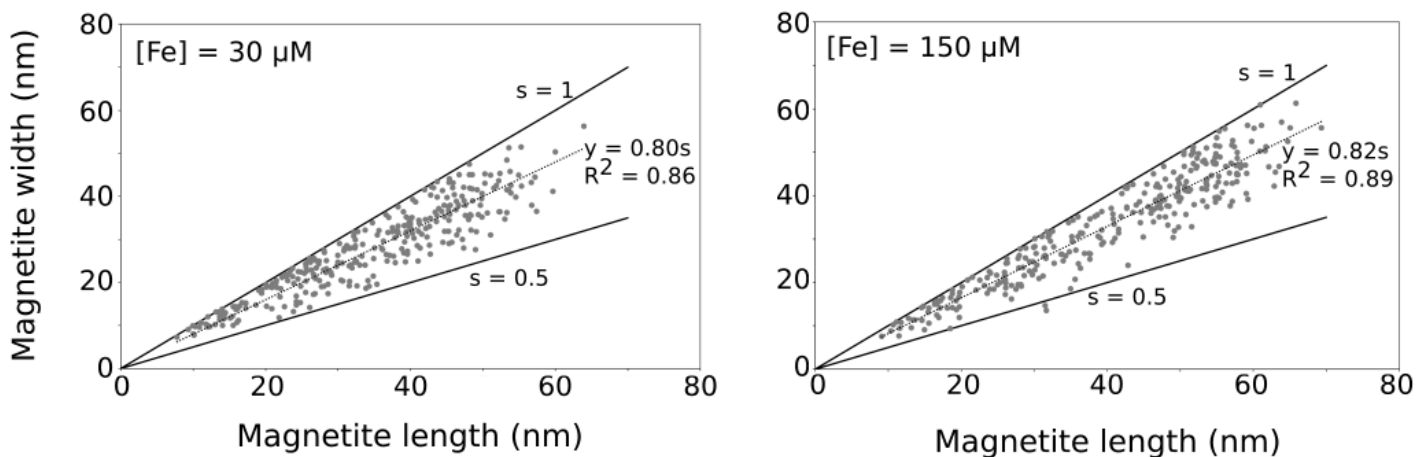

87

88 **FIG S4** Magnetite width represented as a function of magnetite length in AMB-1 cultivated  
 89 with iron at 30 (left) or 150 (right) μM. Assuming a constant shape factor ( $s$ ) (Eq. S1), a linear  
 90 relationship exists between width and length. Data are represented with the best linear fit, as  
 91 well as two linear fits for a given shape factor of 1 and 0.5.

92

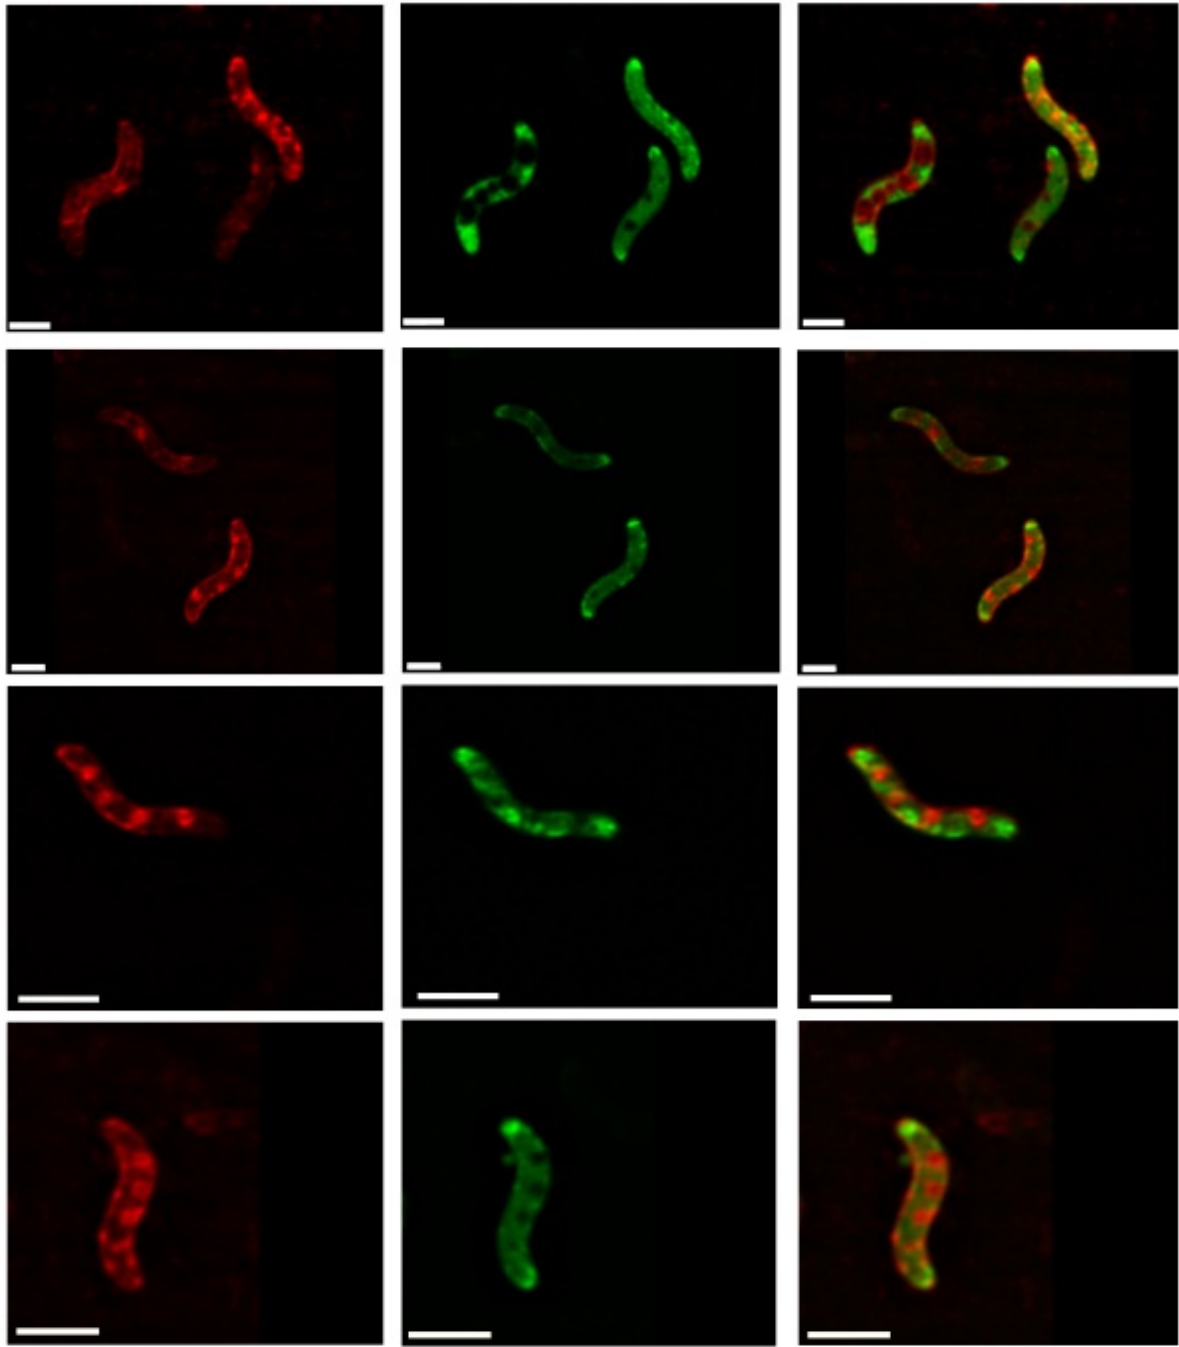

93

94 **FIG S5** Red (left panels), green (center panels), and merged (right panels) fluorescence

95 images of wild-type AMB-1 incubated with FIP-1 for 90 min. Scale bars = 1  $\mu$ m.

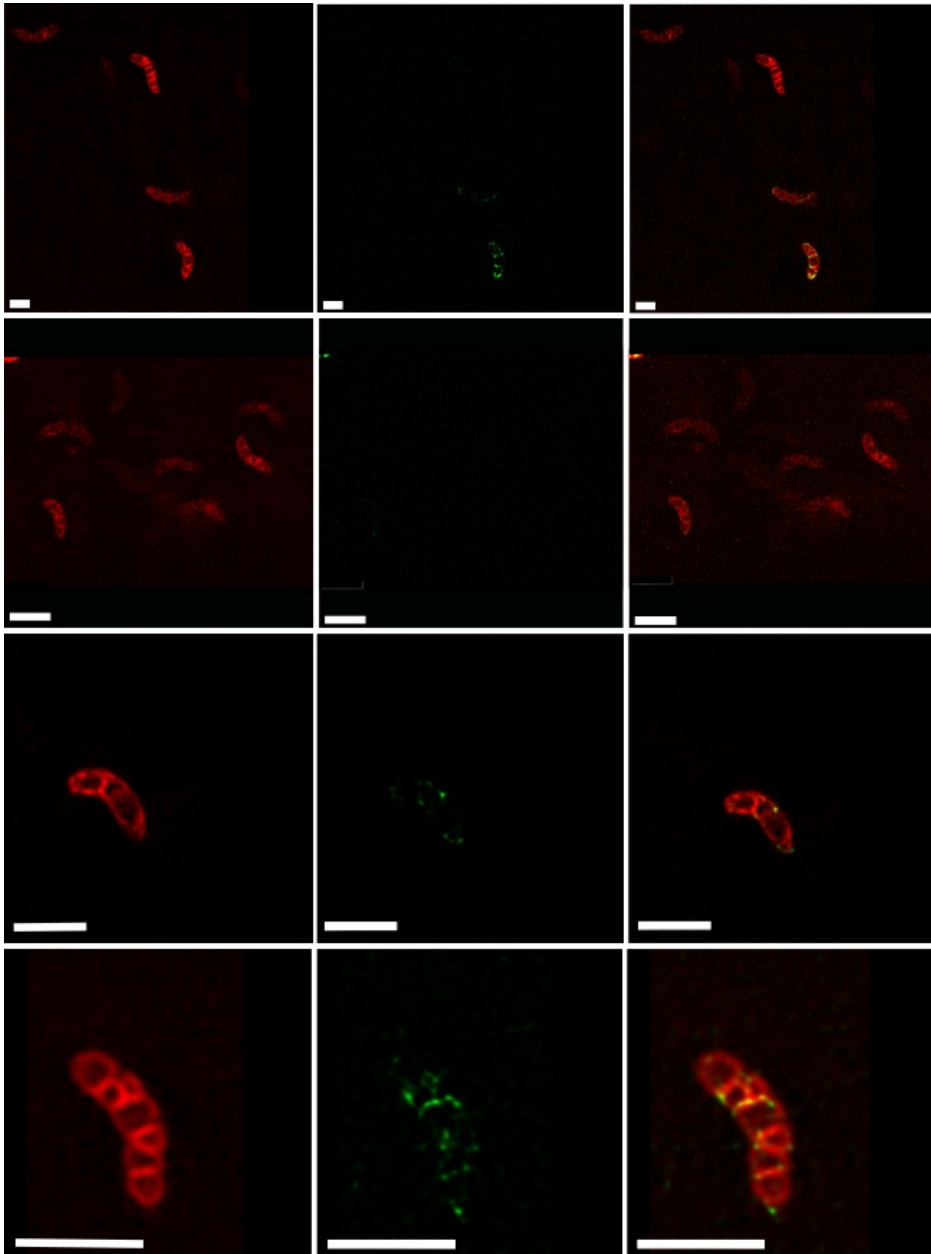

96

97 **FIG S6** Red (left panels), green (center panels), and merged (right panels) fluorescence

98 images of  $\Delta$ MAI AMB-1 incubated with FIP-1 for 90 min. Scale bars = 1  $\mu$ m.

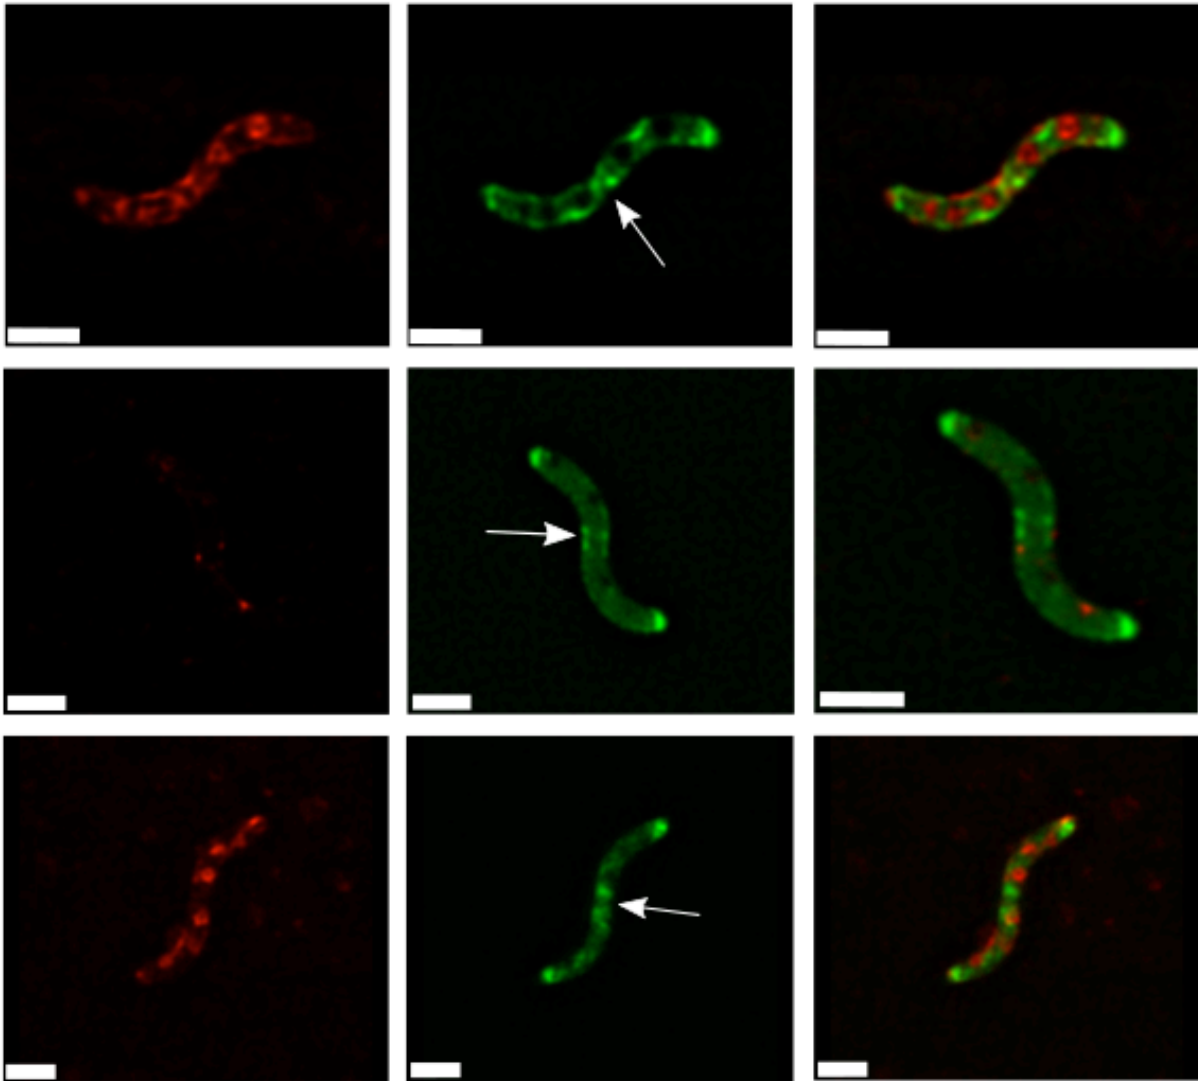

99

100 **FIG S7** Red (left panels), green (center panels) and merged (right panels) fluorescence  
101 images of dividing wild-type cells incubated with FIP-1 for 90 min. Arrows point at higher  
102 green fluorescence signal in the cell that may be located at the septum location during cell  
103 division. Scale bars = 1  $\mu\text{m}$ .

104

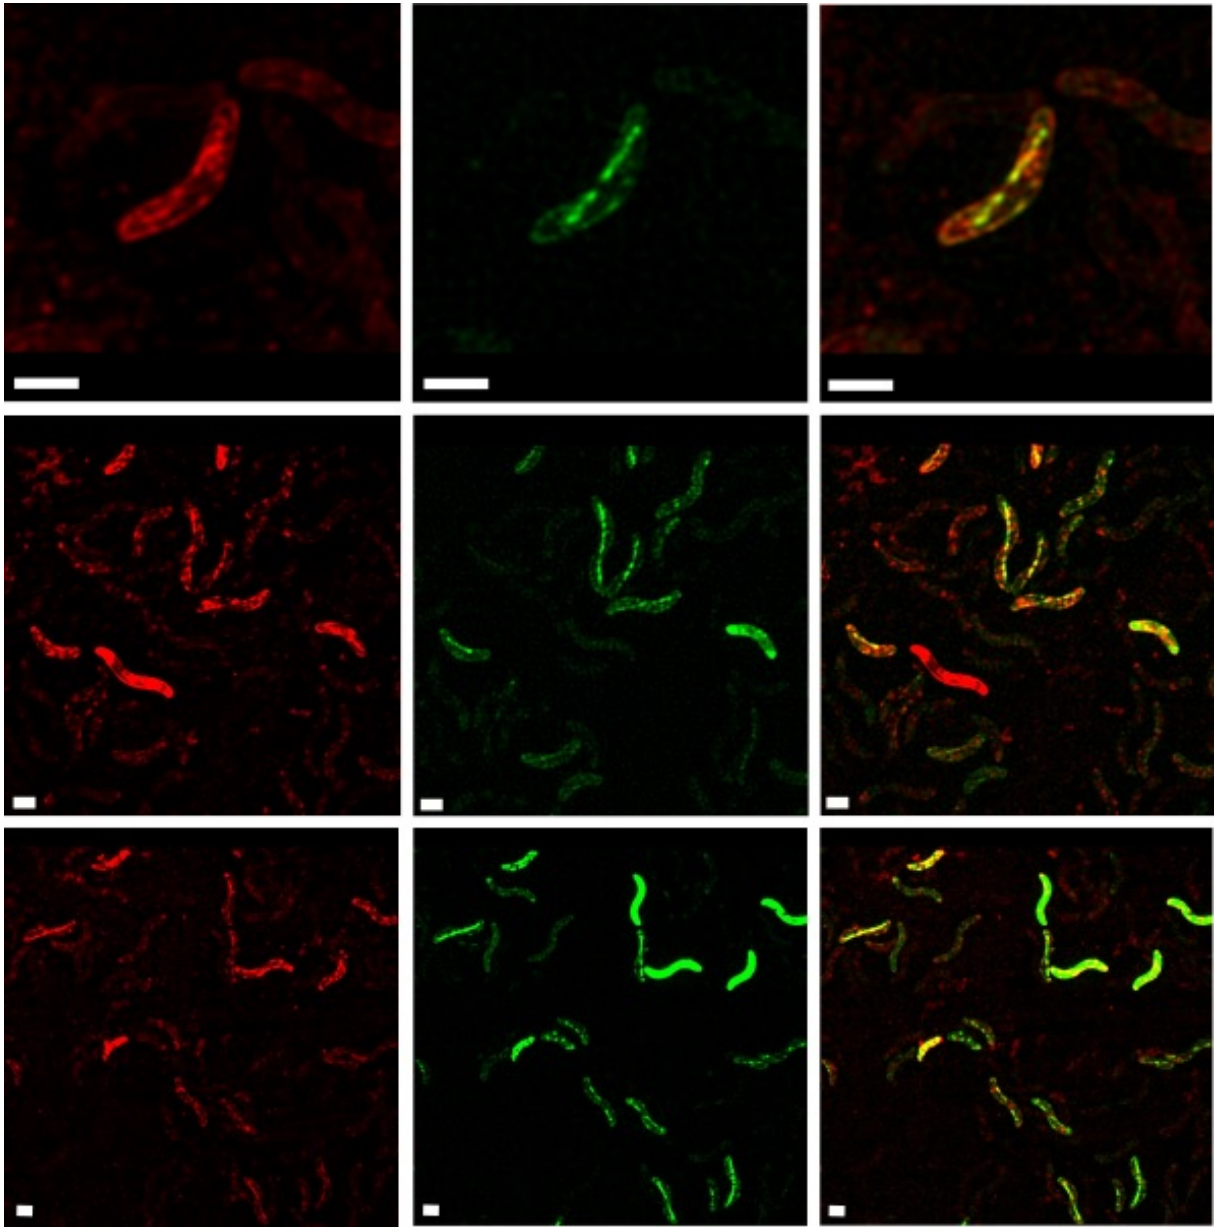

105

106 **FIG S8** Red (left panels), green (center panels) and merged (right panels) fluorescence

107 images of wild-type AMB-1 incubated with FIP-1 for 180 min. Scale bars = 1  $\mu$ m.

108

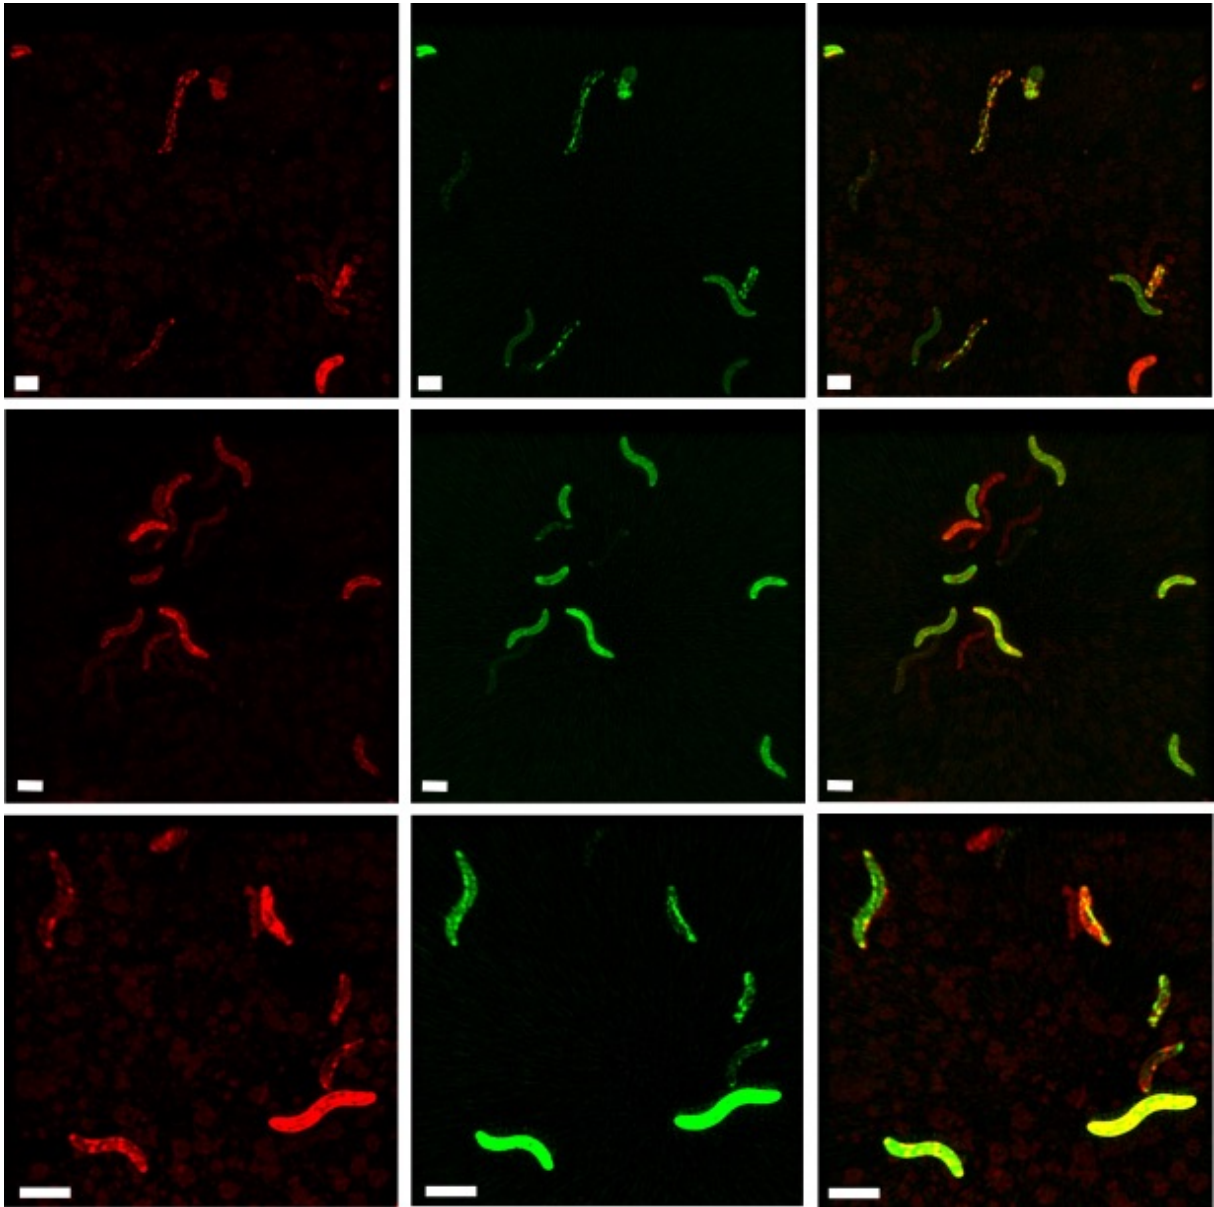

109

110 **FIG S9** Red (left panels), green (center panels) and merged (right panels) fluorescence

111 images of  $\Delta mamP$  AMB-1 incubated with FIP-1 for 180 min. Scale bars = 2  $\mu$ m.

112

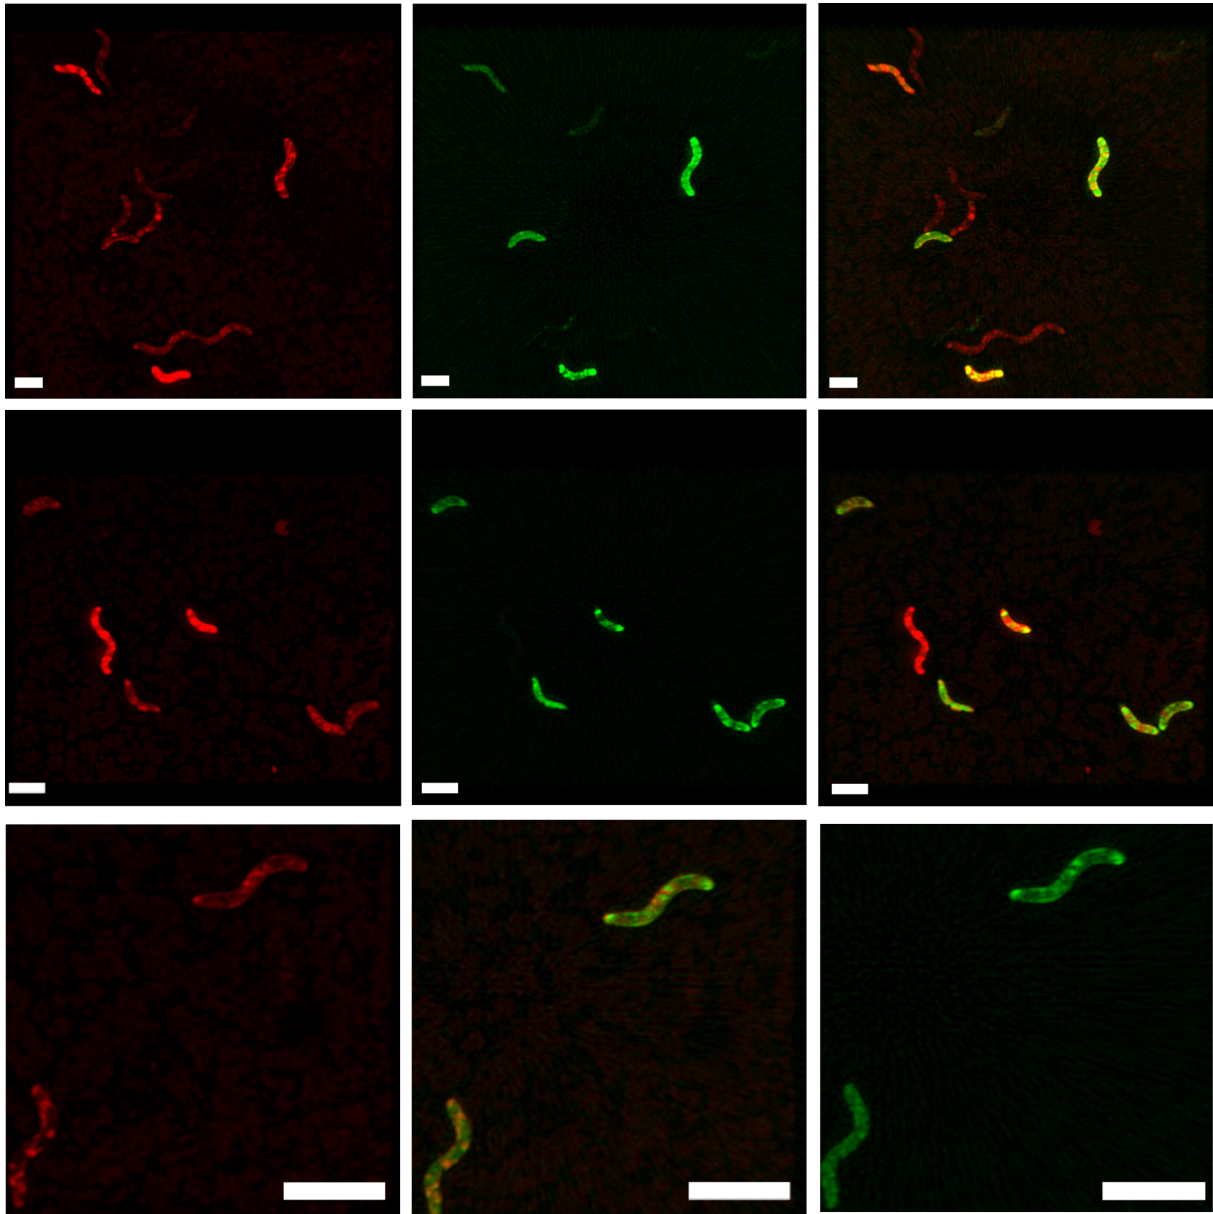

113

114 **FIG S10** Red (left panels), green (center panels) and merged (right panels) fluorescence  
115 images of  $\Delta mamT$  AMB-1 incubated with FIP-1 for 180 min. Scale bars = 2  $\mu\text{m}$ .

116

117 **Supplementary tables**

118 **Table S1** Iron mass balance in AMB-1 wild-type cultures.

| Mass of iron in the initial medium (mg) | Mass of iron in the final medium (mg) | Mass of iron in bacteria (mg) | Mass of iron leaked outside of bacteria (mg) | Iron recovery (%) |
|-----------------------------------------|---------------------------------------|-------------------------------|----------------------------------------------|-------------------|
| 2.31                                    | 2.20                                  | 0.06                          | $0.28 \cdot 10^{-3}$                         | 96                |
| 2.31                                    | 2.15                                  | 0.07                          | $0.17 \cdot 10^{-3}$                         | 96                |
| 2.37                                    | 2.31                                  | 0.05                          | $0.27 \cdot 10^{-3}$                         | 100               |
| 2.27                                    | 2.11                                  | 0.08                          | $0.23 \cdot 10^{-3}$                         | 97                |

119

120



121 **Table S2** Magnetite crystal parameters measured from electron microscopy observations in  
122 wild-type (cultivated at either 30 or 150  $\mu\text{M}$  of iron),  $\Delta\text{mamP}$  and  $\Delta\text{mamT}$  AMB-1 strains.  
123 Errors indicate 1 SD.

|                                | Wild-type<br>(30 $\mu\text{M}$ of iron) | Wild-type<br>(150 $\mu\text{M}$ of iron) | $\Delta\text{mamP}$ | $\Delta\text{mamT}$ |
|--------------------------------|-----------------------------------------|------------------------------------------|---------------------|---------------------|
| Mean magnetite length<br>(nm)  | 32.03                                   | 38.46                                    | 24.13               | 20.2                |
| Width / length ratio           | 0.81                                    | 0.83                                     | 0.72                | 0.68                |
| Number of crystals per<br>cell | 17.20 $\pm$ 4                           | 20.75 $\pm$ 6                            | 9.00 $\pm$ 3.57     | 21.00 $\pm$ 6.53    |
| Number of crystals<br>analyzed | 344                                     | 351                                      | 205                 | 274                 |

124

125

126 **References**

- 127 Cornell RM, Schwertmann U. 2013. The iron oxides: structure, properties, reactions,  
128 occurrences and uses, second edition. Wiley-VCH Verlag GmbH & Co. KGaA.
- 129 Jones SR, Wilson TD, Brown ME, Rahn-Lee L, Yu Y, Fredriksen LL, Ozyamak E, Komeili  
130 A, Chang MCY. 2015. Genetic and biochemical investigations of the role of MamP in  
131 redox control of iron biomineralization in *Magnetospirillum magneticum*. Proc Natl Acad  
132 Sci USA 112: 3904-3909. <https://doi.org/10.1073/pnas.1417614112>.
- 133 Li J, Pan Y, Chen G, Liu Q, Tian L, Lin W. 2009. Magnetite magnetosome and fragmental  
134 chain formation of *Magnetospirillum magneticum* AMB-1: transmission electron  
135 microscopy and magnetic observations. Geophys J Int 177: 33-42.  
136 <https://doi.org/10.1111/j.1365-246X.2009.04043.x>.
- 137
